# Supplementary material for: Tailoring gold and silver colloidal bimetallic nanoalloys towards SERS detection of rhodamine 6G
Source: Royal Society of Chemistry journal article supplement (doi:10.1039/c7ra00685c), 2017-01-01
Supplement: c7ra00685c1.pdf [file c7ra00685c1.pdf]

## **Tailoring Gold and Silver Colloidal Bimetallic Nanoalloys Towards SERS Detection of Rhodamine 6G**

A. V. Girão,<sup>a†</sup> P. C. Pinheiro,<sup>b</sup> M. Ferro<sup>a</sup> and T. Trindade<sup>b</sup>

<sup>a</sup> Department of Materials and Ceramic Engineering - CICECO, University of Aveiro, Campus de Santiago, 3810-193 Aveiro, Portugal

<sup>b</sup> Department of Chemistry - CICECO, University of Aveiro, Campus de Santiago, 3810-193 Aveiro, Portugal

<sup>†</sup> Corresponding Author  
Email: avgirao@ua.pt

### **Supporting Information**

#### **Figures**

S1 - UV-Vis absorption spectra for colloidal NPs Au, Ag and physical mixture of Au and Ag NPs

S2 - TEM-EDX spectra showing the elemental composition of the obtained gold and silver BNPs

S3 - SEM images showing the morphology of the obtained thin films for the NPs and BNPs deposited onto the surface of glass substrates

S4 - SEM-EDX spectra and mapping showing the elemental composition of the obtained thin films of BNPs deposited onto the surface of glass substrates

S5 – UV-Vis absorption spectrum obtained for the aqueous solution of Rhodamine 6G  $10^{-4}$  M showing the different absorption bands along the analyzed range

S6 - UV-Vis reflectance spectra for the thin films of colloidal Au, Ag, AuAg and AgAu NPs deposited by controlled evaporation onto the glass slide surface

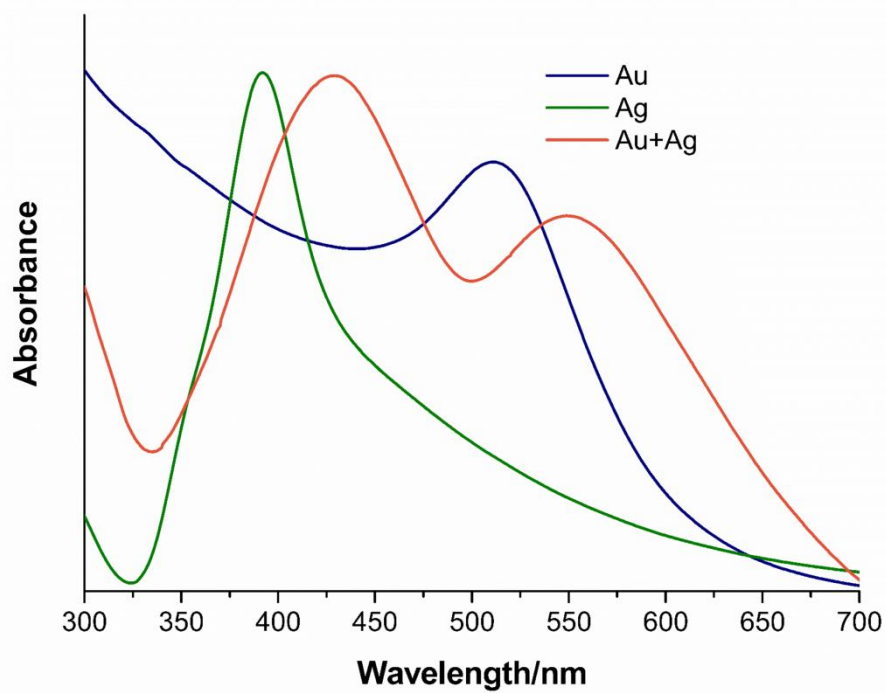

**Figure S1.** UV-Vis absorption spectra for colloidal NPs Au, Ag and physical mixture of Au and Ag NPs.

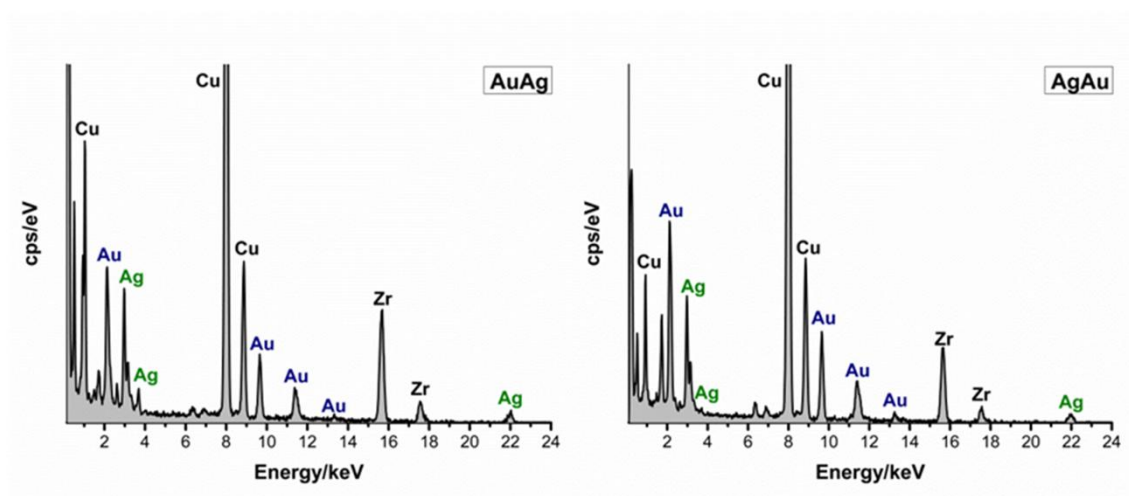

**Figure S2.** TEM-EDX spectra showing the elemental composition of the obtained gold and silver BNPs.

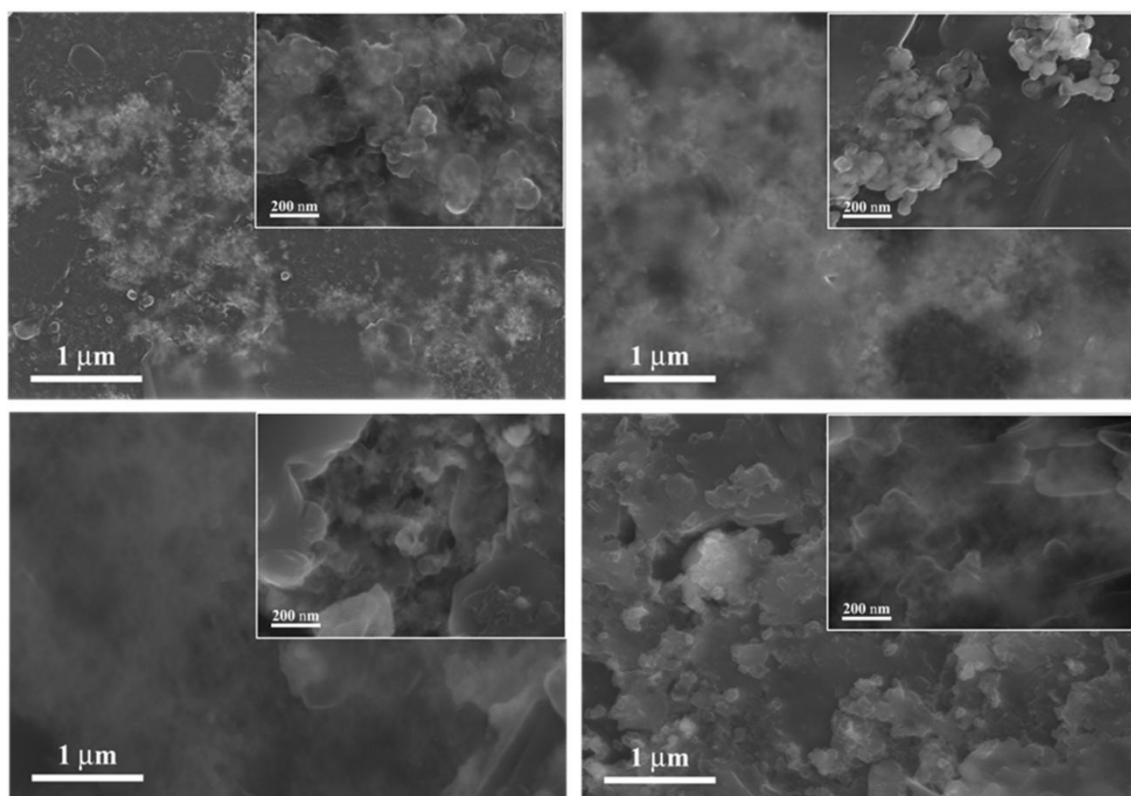

**Figure S3.** SEM images showing the morphology of the obtained thin films for the NPs (Au: upper left; Ag: upper right) and BNPs (AuAg: lower left; AgAu: lower right) deposited onto the surface of glass substrates.

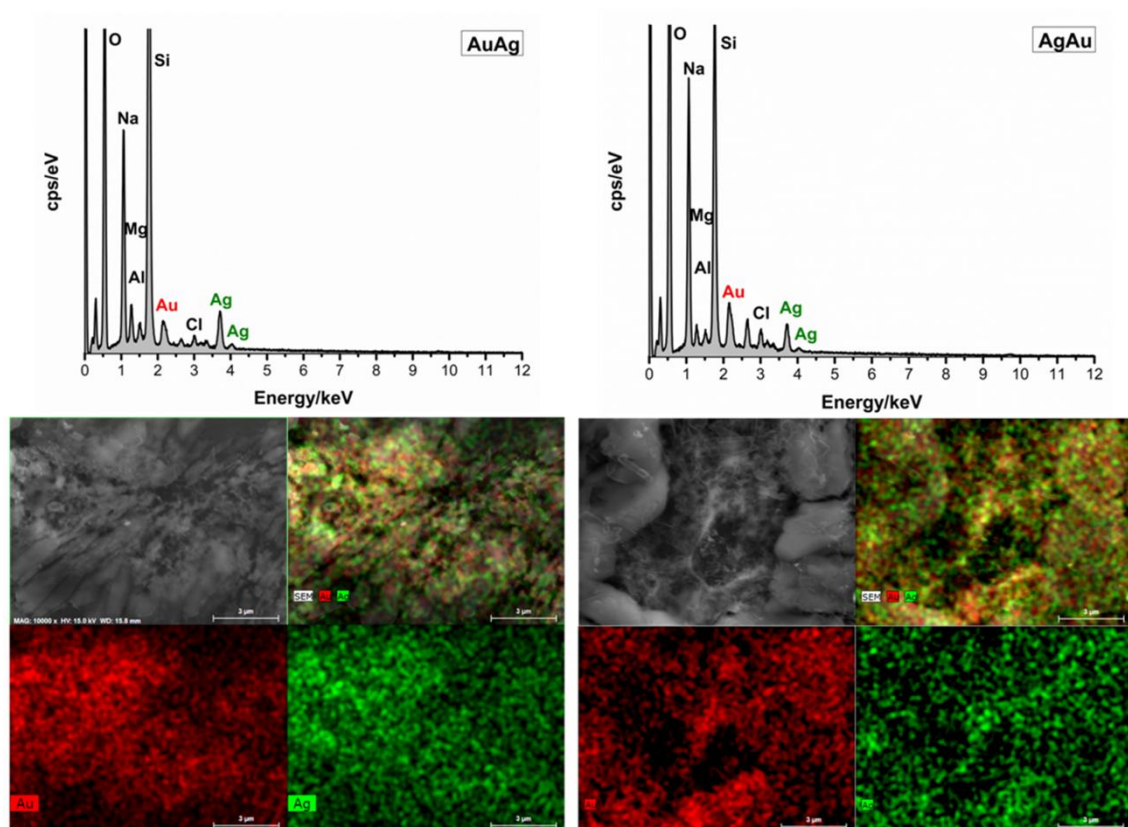

**Figure S4.** SEM-EDX spectra and mapping showing the elemental composition of the obtained thin films of BNPs deposited onto the surface of glass substrates (AuAg: left; AgAu: right).

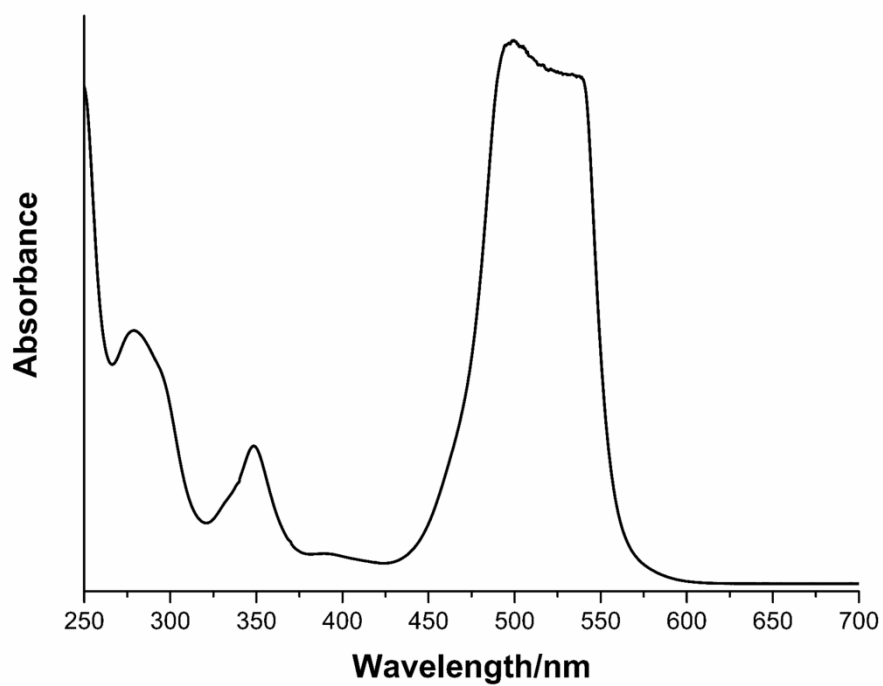

**Figure S5.** UV-Vis absorption spectrum obtained for the aqueous solution of Rhodamine 6G  $10^{-4}$  M showing the different absorption bands along the analyzed range.

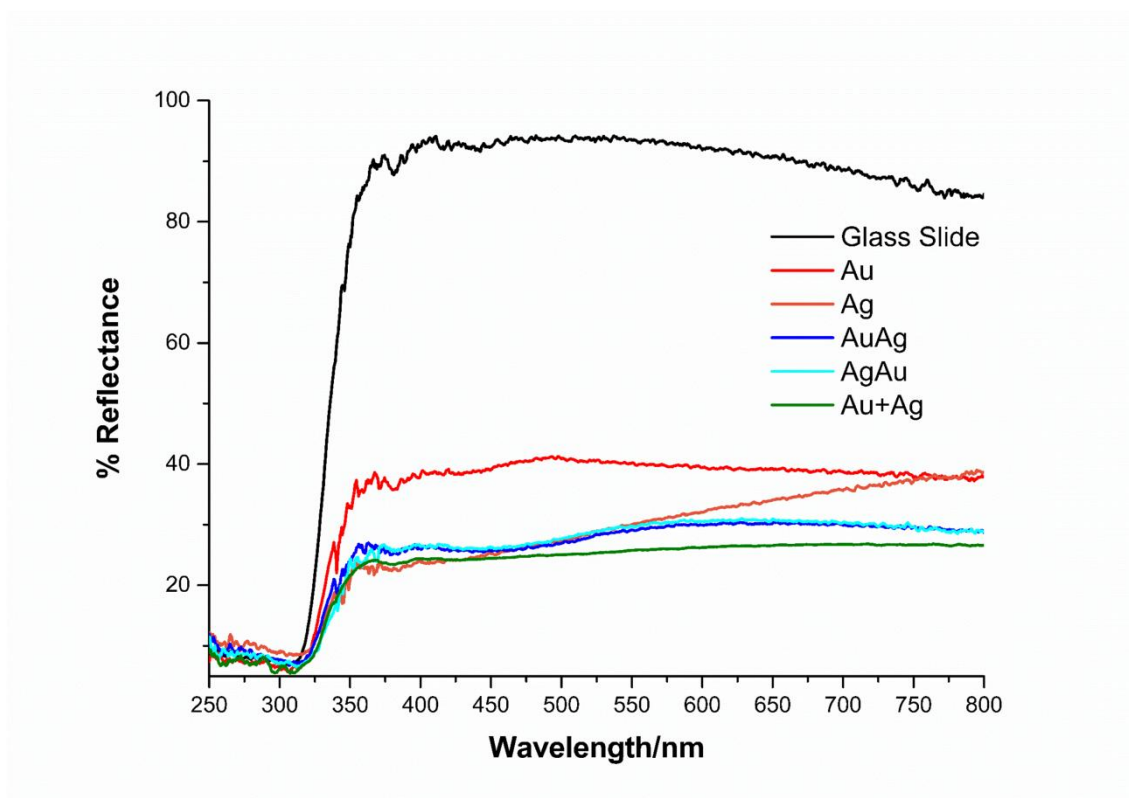

**Figure S6.** UV-Vis reflectance spectra for the thin films of colloidal Au, Ag, AuAg and AgAu NPs deposited by controlled evaporation onto the glass slide surface.
